# Supplementary material for: Targeted mass spectrometry to quantify brain-derived cerebrospinal fluid biomarkers in Alzheimer’s disease
Source: PubMed Central journal article supplement (PMC7257173; doi:10.1186/s12014-020-09285-8), 2020-05-29

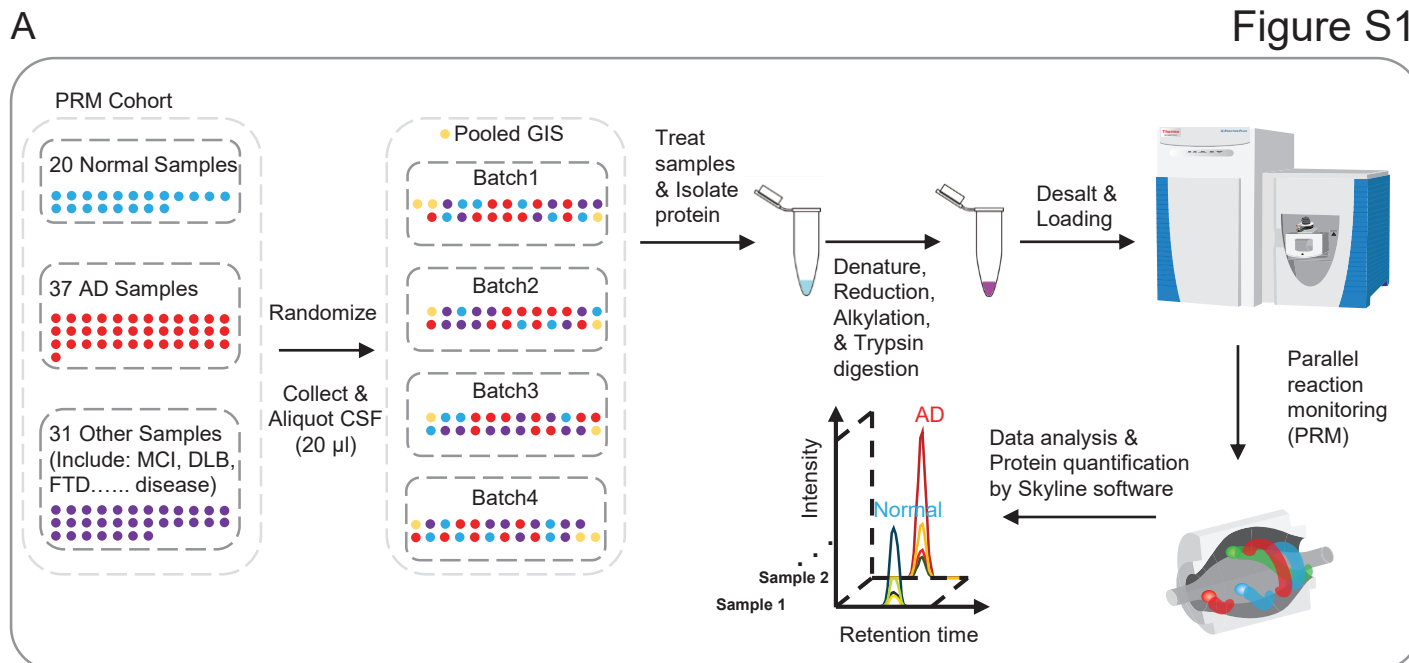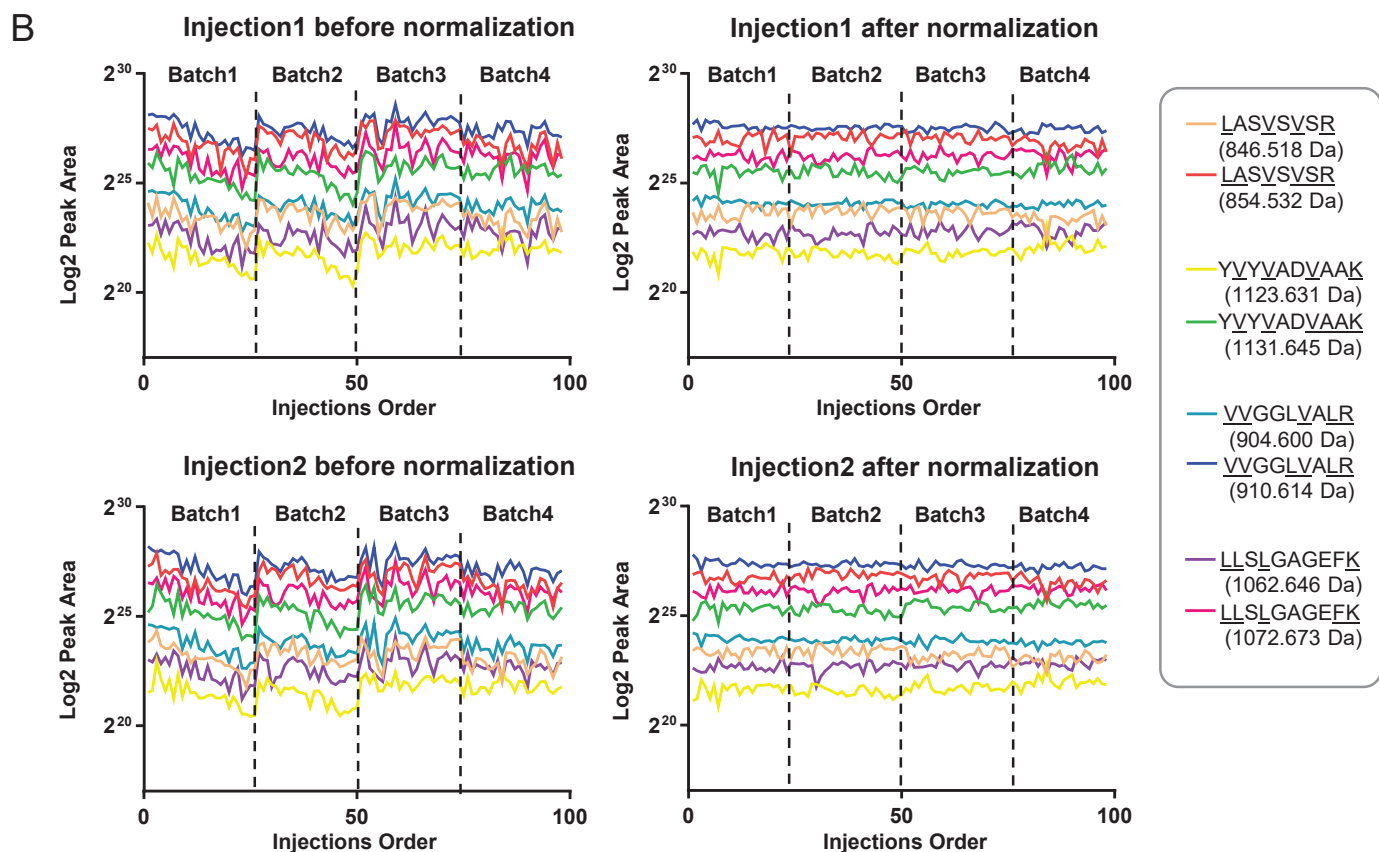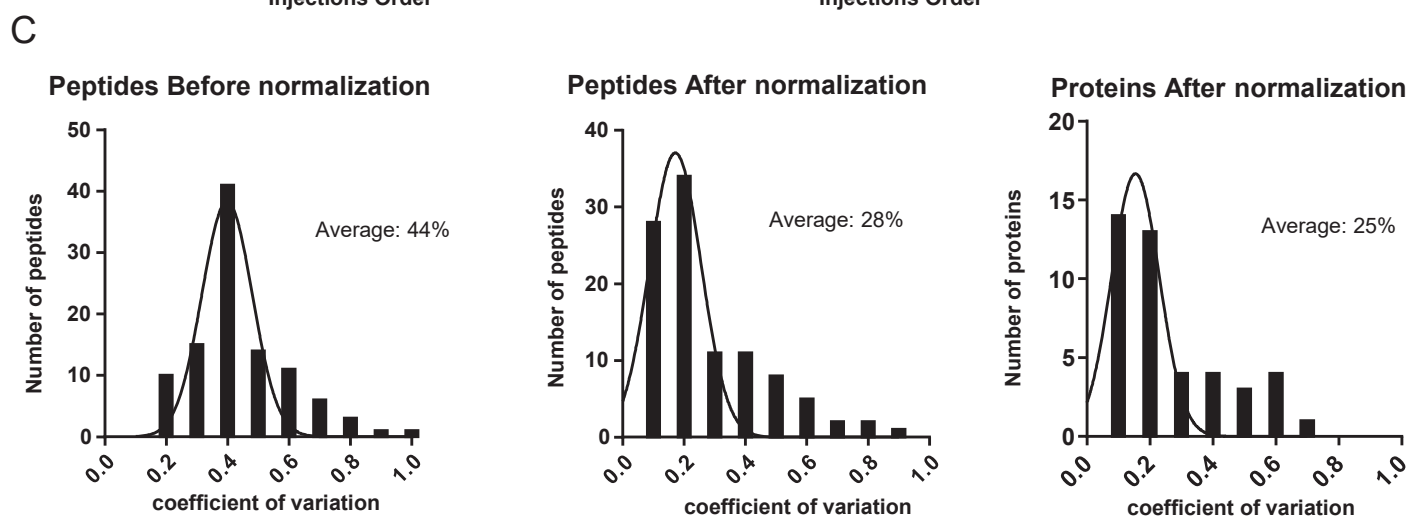

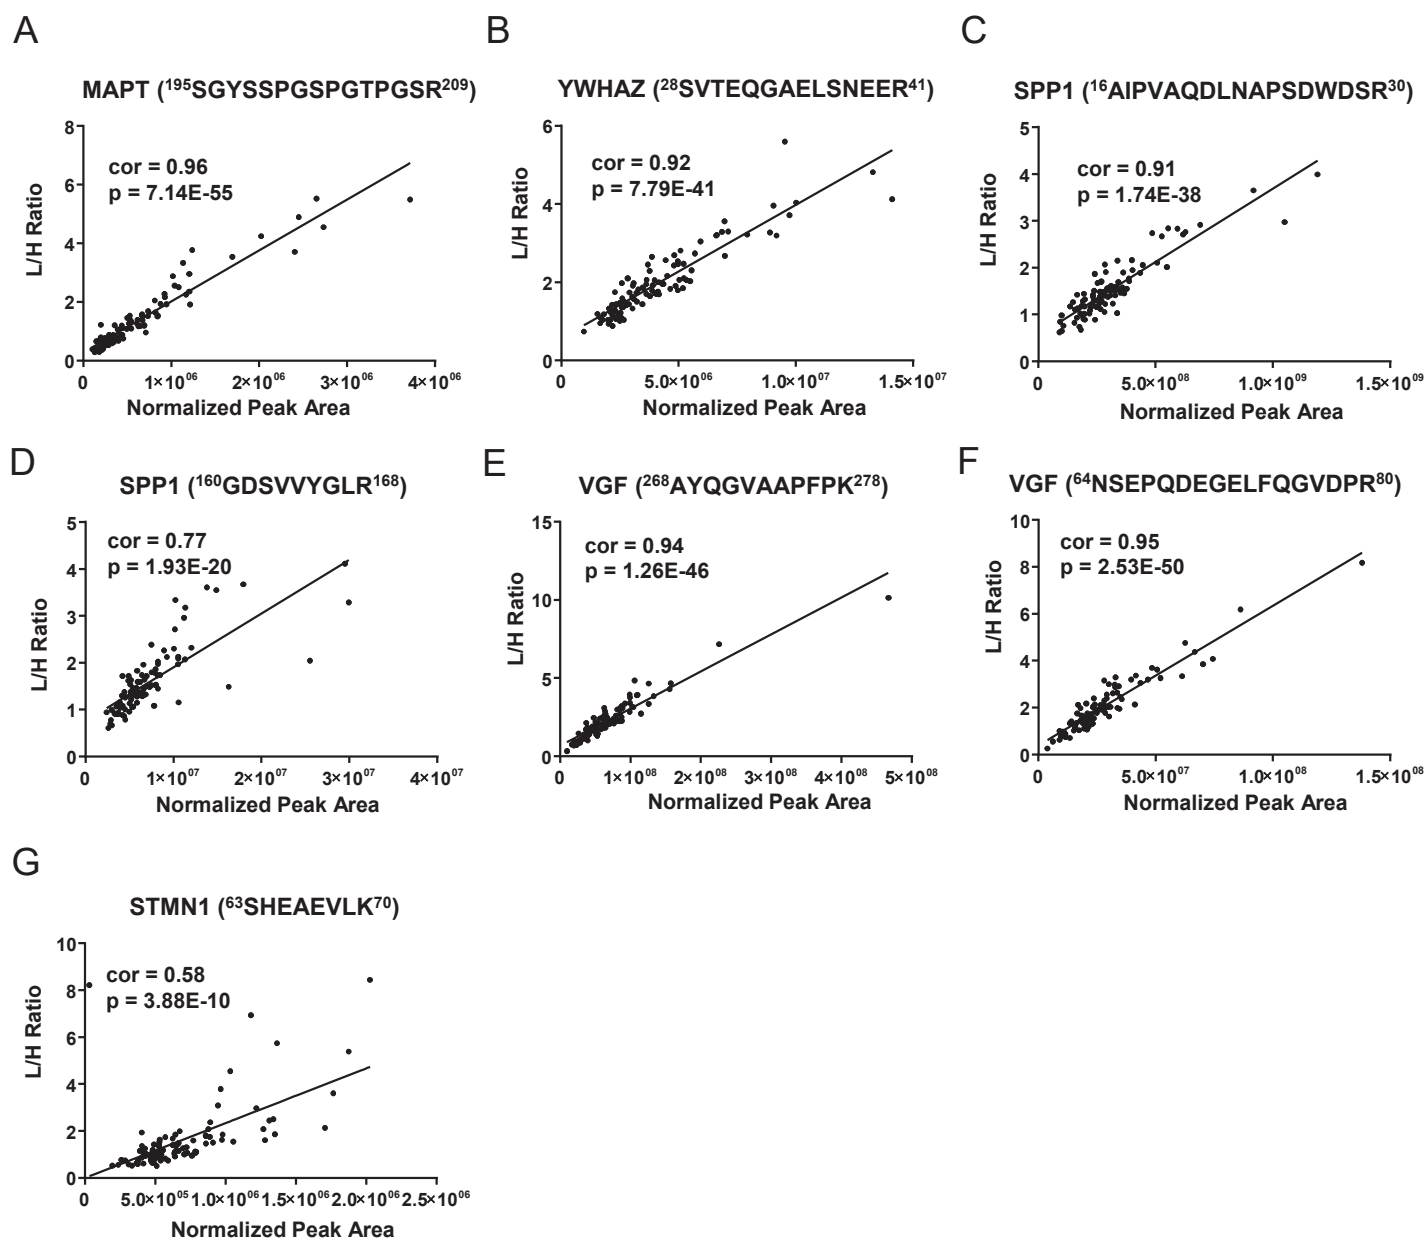

A

## Neuronal / Synaptic

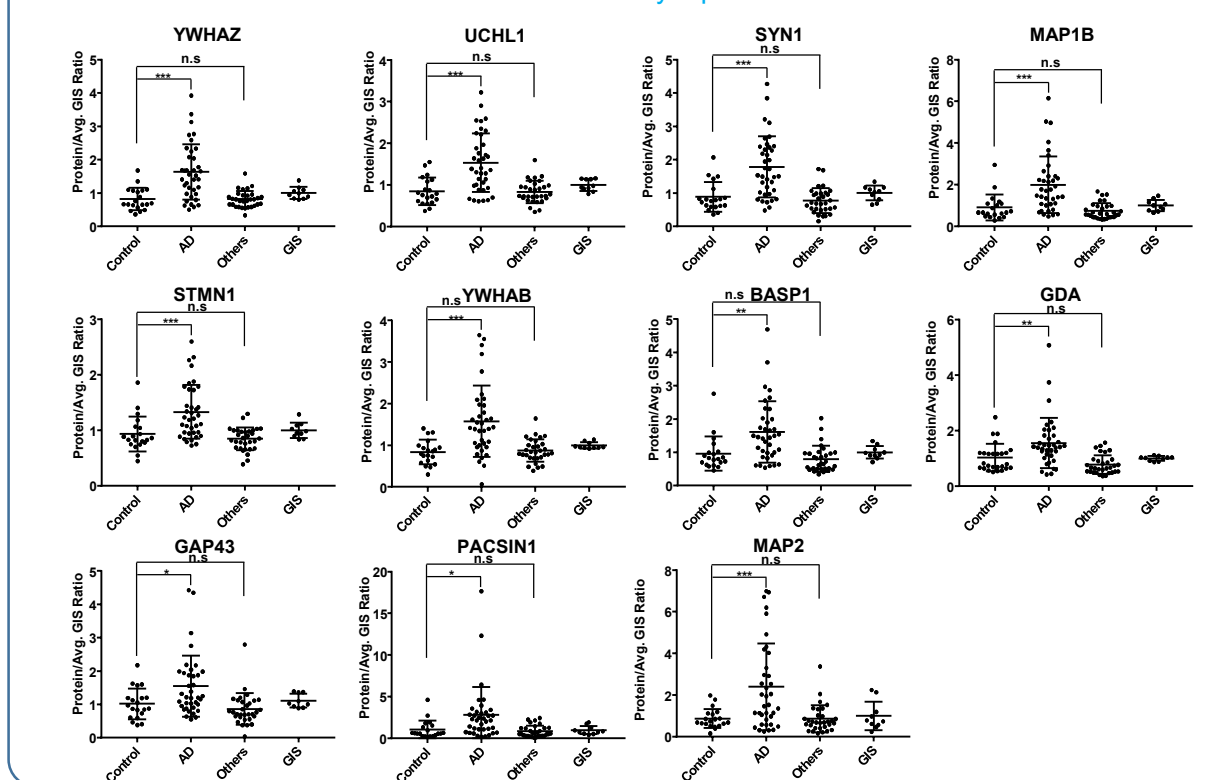

B

## Glia / Inflammation

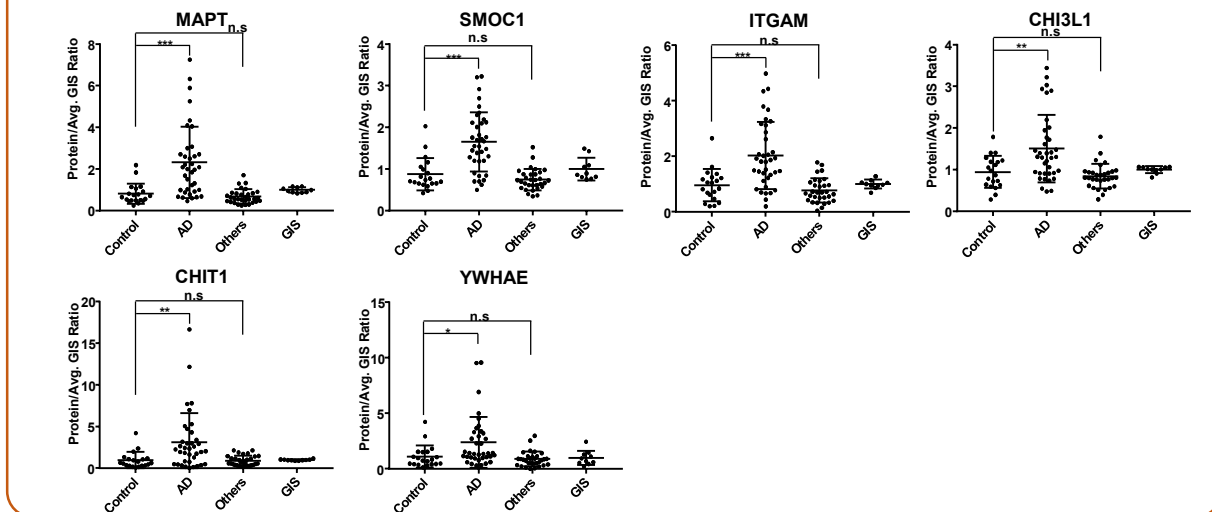

C

## Myelin

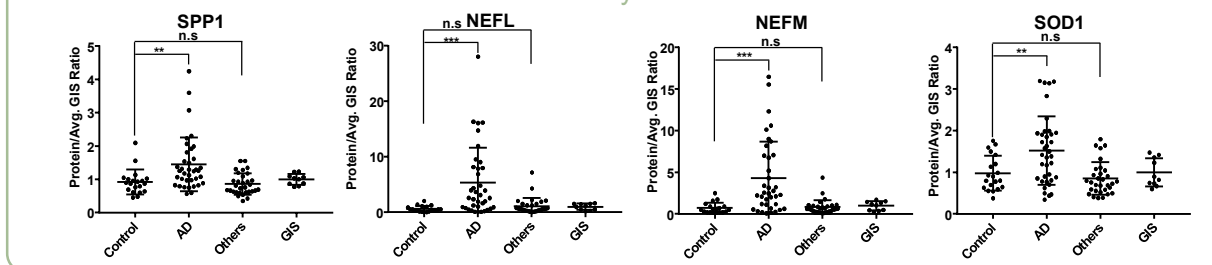

D

## Metabolism

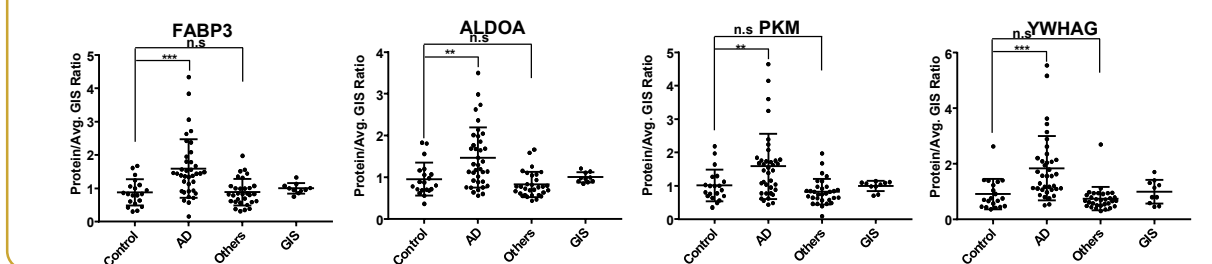

**A**  
Endogenous (Light)

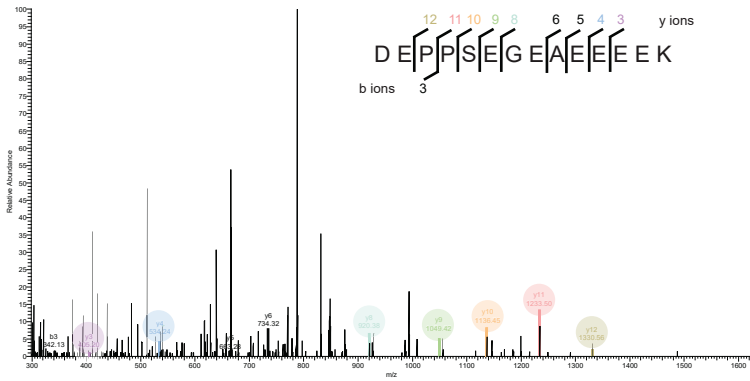

NEFL (<sup>467</sup>DEPPSEGEAEEEEK<sup>480</sup>)

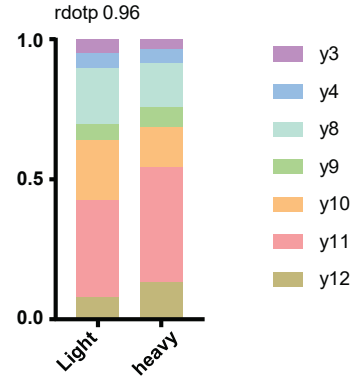

Standard (Heavy)

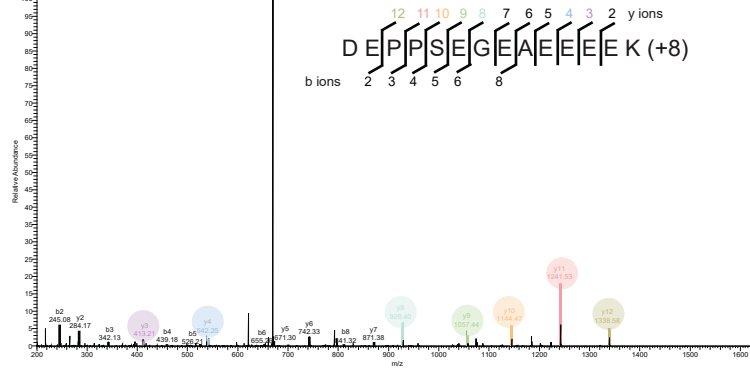

**B**

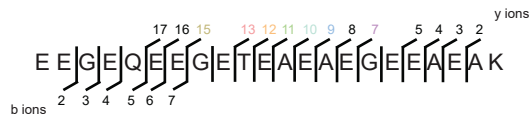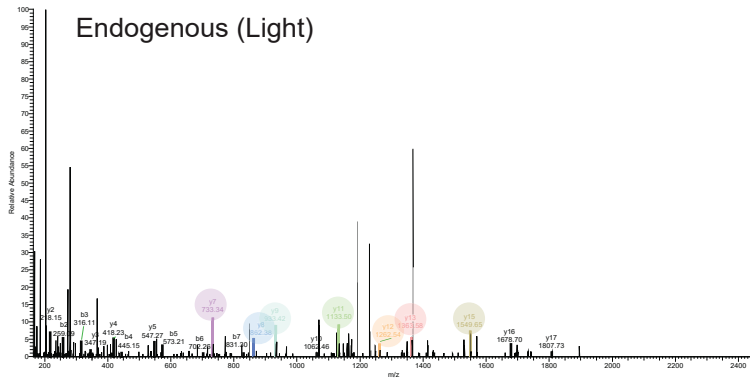

NEFM (<sup>561</sup>EEGEQEEGETEAEEGEEAEAK<sup>582</sup>)

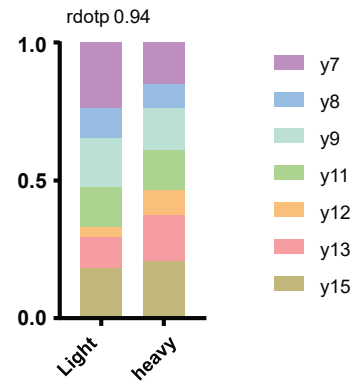

Standard (Heavy)

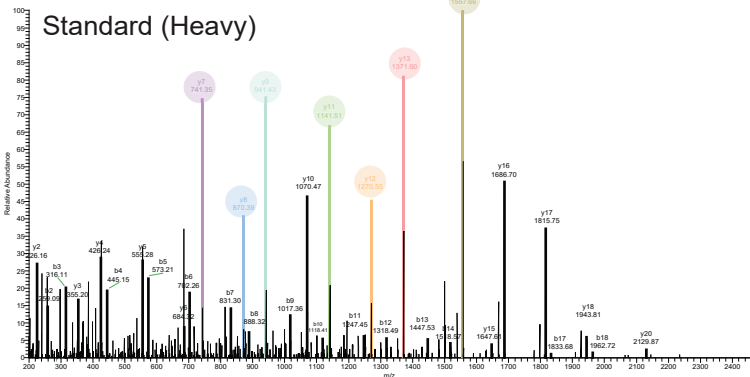

Supplement: 12014_2020_9285_MOESM2_ESM.pdf [file 12014_2020_9285_MOESM2_ESM.pdf]
